# Supplementary material for: Imaging dynamic mTORC1 pathway activity in vivo reveals marked shifts that support time-specific inhibitor therapy in AML
Source: PubMed Central journal article supplement (PMC7801403; doi:10.1038/s41467-020-20491-8), 2021-01-11
Supplement: 41467_2020_20491_MOESM2_ESM.pdf [file 41467_2020_20491_MOESM2_ESM.pdf]

## Description of Additional Supplementary Files

**Supplementary Movie 1:** The time lapse video of apoptosis process of AML for 8 hours of Ara-C treatment (the static images were shown in Supplementary Fig.5b). Green: FRET positive (live) cells, Red: FRET negative (apoptotic) cells.

**Supplementary Movie 2:** The higher magnification of the time lapse video of AML cell apoptosis *in vivo* with intravital confocal time lapse imaging at day 2 of chemotherapy (the static images were shown in Supplementary Fig. 5d) Green: FRET positive (live) cells, Yellow: FRET negative (apoptotic) cells.

**Supplementary Movie 3:** The lower magnification of the time lapse video of AML cell apoptosis *in vivo* with intravital confocal time lapse imaging at day 2 of chemotherapy (the static images were shown in Supplementary Fig. 5d) Green: FRET positive (live) cells, Yellow: FRET negative (apoptotic) cells.
